# Supplementary material for: Chiral analysis of β-methylamino alanine (BMAA) enantiomers after (+)-1-(9-fluorenyl)-ethyl chloroformate (FLEC) derivatization and LC-MS/MS
Source: Royal Society of Chemistry journal article supplement (doi:10.1039/c8ay02287a), 2018-12-12
Supplement: c8ay02287a1.pdf [file c8ay02287a1.pdf]

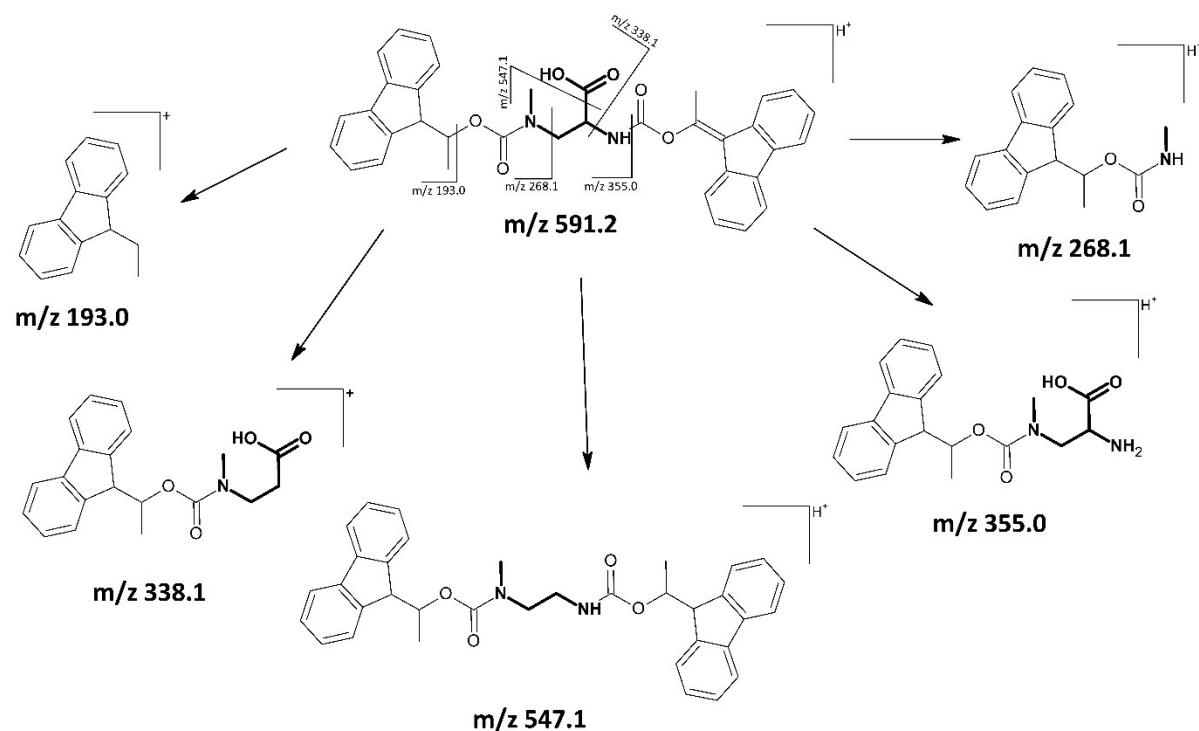

**Supplementary Fig 1:** Proposed fragmentation for BMAA derivatized with two FLEC molecules obtained with linear ion trap mass spectrometer. Two general fragments ( $m/z$  547.1, 355.0) and two specific fragments ( $m/z$  338.1, 268.1) are formed from the cleaved BMAA molecule.

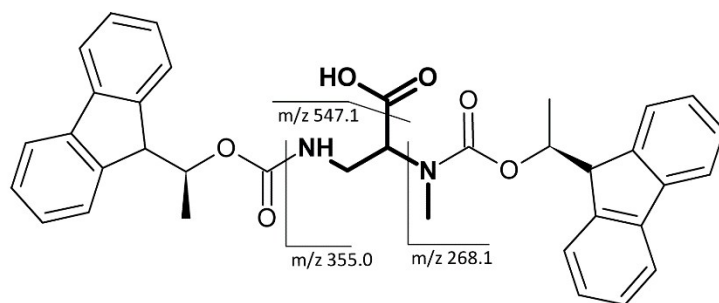

BAMA

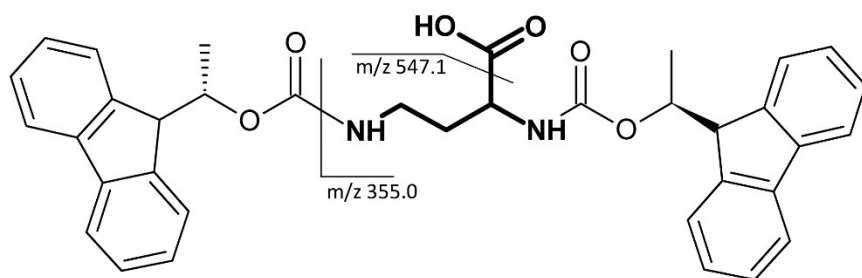

DAB

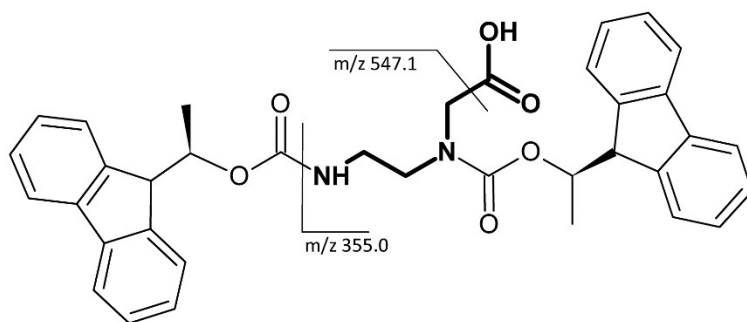

AEG

**Supplementary Fig 2:** Proposed fragmentation for the FLEC-derivatised isomers BAMA, DAB and AEG obtained with linear ion trap mass spectrometer. Only general fragments with  $m/z$  355.0 and  $m/z$  547.1 are observed for the isomers.
